## RESEARCH ARTICLE

# ErbB1 and ErbB4 generate opposing signals regulating mesenchymal cell proliferation during valvulogenesis

Ryo Iwamoto, Naoki Mine\*, Hiroto Mizushima and Eisuke Mekada<sup>†</sup>

## ABSTRACT

Heparin-binding EGF-like growth factor (HB-EGF) plays an indispensable role in suppression of cell proliferation during mouse valvulogenesis. However, ligands of the EGF receptor (EGFR/ErbB1), including HB-EGF, are generally considered as growth-promoting factors, as shown in cancers. HB-EGF binds to and activates ErbB1 and ErbB4. We investigated the role of ErbB receptors in valvulogenesis *in vivo* using ErbB1- and ErbB4-deficient mice, and an *ex vivo* model of endocardial cushion explants. We show that HB-EGF suppresses valve mesenchymal cell proliferation through a heterodimer of ErbB1 and ErbB4, and an ErbB1 ligand (or ligands) promotes cell proliferation through a homodimer of ErbB1. Moreover, a rescue experiment with cleavable or uncleavable isoforms of ErbB4 in *ERBB4*-null cells indicates that the cleavable JM-A, but not the uncleavable JM-B, splice variant of ErbB4 rescues the defect of the null cells. These data suggest that the cytoplasmic intracellular domain of ErbB4, rather than the membrane-anchored tyrosine kinase, achieves this suppression. Our study demonstrates that opposing signals generated by different ErbB dimer combinations function in the same cardiac cushion mesenchymal cells for proper cardiac valve formation.

**KEY WORDS:** ErbB, HB-EGF, Mouse, Valvulogenesis

## INTRODUCTION

The ErbB system, comprising epidermal growth factor (EGF)-family members and ErbB receptor tyrosine kinases (RTKs), is fundamental in cell proliferation, differentiation, migration and survival. In mammals, the EGF–ErbB system comprises four receptors: EGF receptor (EGFR)/ErbB1, ErbB2, ErbB3 and ErbB4. It also includes multiple EGF-family ligands, including EGF, transforming growth factor  $\alpha$  (TGF $\alpha$ ; also known as TGFA), amphiregulin (ARG), heparin-binding EGF-like growth factor (HB-EGF), betacellulin (BTC), epiregulin (ERG), epigen (EPG) and neuregulin (NRG) proteins 1 to 4. Although EGF-family ligands share a conserved receptor-binding motif, and soluble forms are usually produced from membrane-anchored precursors (Harris et al., 2003), EGF-family members bind to the various ErbB receptors with differing degrees of preference (Riese and Stern, 1998). Moreover, in addition to the different ligand specificities and downstream signalling molecules of ErbB receptors, they form homo- and heterodimers in various combinations (Olayioye et al., 2000). Thus, the vast number of ligand and receptor combinations provides redundancy and robustness in the

EGF–ErbB system, which makes it possible for the bioactivities exerted by the system to be finely tuned. The complexity of the EGF–ErbB system implies that different combinations of EGF-family ligands and ErbB RTKs affect a wide range of cellular behaviours *in vivo*. However, the physiological significance of such diversity in the intracellular signals generated by the EGF–ErbB system remains to be elucidated. Moreover, there is little information about how such diverse signals are precisely regulated *in vivo*, and which EGF-ligand–ErbB-RTK and ErbB dimer combinations specifically function in certain physiological processes. In this study, we aimed to resolve these issues.

HB-EGF binds to ErbB1 and ErbB4 (Higashiyama et al., 1991; Elenius et al., 1997; Raab and Klagsbrun, 1997). Analyses of HB-EGF-null mice have revealed that HB-EGF plays pivotal roles in several physiological and pathological processes (Mekada and Iwamoto, 2008). Similar to other ErbB1 ligands, because HB-EGF is a potent mitogen that has been implicated in cancer progression and malignancy, it is generally known as a growth-promoting factor. However, in developmental and physiological processes, HB-EGF is not characterised as a growth-promoting factor but rather acts as a growth-inhibiting or migration-promoting factor (Mekada and Iwamoto, 2008). Cardiac valve development (valvulogenesis) is an example of a process in which HB-EGF functions as a growth-inhibiting factor (Iwamoto and Mekada, 2006).

Mouse valvulogenesis occurs in two consecutive steps: cardiac cushion formation and valve remodelling (Schroeder et al., 2003; Armstrong and Bischoff, 2004). The cardiac cushion is the primordial tissue of cardiac valves, and the cushion formation stage is accompanied by the endothelial-to-mesenchymal transition. In mice, this stage is completed by embryonic day (E)12.5 (Lakkis and Epstein, 1998) and followed by remodelling of the cushions to form thin valve leaflets. Although much is known about the signalling pathways involved in cushion formation, the molecular mechanisms underlying valve remodelling are still poorly understood. HB-EGF is expressed and functions during the remodelling process (Iwamoto et al., 2010). Several HB-EGF-deficient mouse lines show valve abnormalities, indicating that HB-EGF is critical for normal valvulogenesis (Iwamoto et al., 2003, 2010; Jackson et al., 2003; Yamazaki et al., 2003; Iwamoto and Mekada, 2006). Such mutant mice have enlarged cardiac valves owing to hyperproliferation of mesenchymal cells. These studies indicate that the soluble form of HB-EGF, which is secreted from endocardial cells, functions as a growth-inhibiting factor for mesenchymal cells. In addition, they suggest that signals promoting cell proliferation exist in parallel with the HB-EGF-mediated inhibitory cascade. However, the precise molecular mechanism controlling such mesenchymal cell proliferation is still unclear.

To address these issues, we performed *in vivo* experiments using several mutant mouse lines and *ex vivo* experiments using cardiac cushion explants. The *ex vivo* experimental culture system recapitulates the *in vivo* phenomena and has shown a functional relationship between HB-EGF and mesenchymal cell proliferation

Department of Cell Biology, Research Institute for Microbial Diseases, Osaka University, Osaka 565-0871, Japan.

\*Present address: CanBas Co., Ltd., 2-2-1 Ohtemachi, Numazu, Shizuoka 410-0801, Japan.

<sup>†</sup>Author for correspondence (emekada@biken.osaka-u.ac.jp)

 R.I., 0000-0001-5060-8100; E.M., 0000-0001-8858-4781

Received 14 August 2016; Accepted 13 February 2017

(Iwamoto et al., 2010). In the present study, we demonstrate the regulatory mechanism for mouse valvulogenesis, in which ErbB RTKs finely regulate mesenchymal cell proliferation in a dual mode via dimerization with different partners: ErbB1 and ErbB4 form a heterodimer receptor for HB-EGF, resulting in growth inhibition, whereas homodimerization of ErbB1 produces a receptor for a certain ErbB1 ligand(s), leading to growth promotion. Moreover, in terms of the former inhibitory signalling, the cleavable JM-A, but not the uncleavable JM-B, splice variant of ErbB4 rescues the defect of *ERBB4*-null cells, suggesting that the cytoplasmic intracellular domain (ICD) of ErbB4, rather than the membrane-anchored tyrosine kinase, achieves this suppression. These results provide evidence of a new and elaborate mechanism for the regulation of cell proliferation through specific ErbB dimer combinations *in vivo*.

## RESULTS

### ErbB1 is involved in HB-EGF-mediated suppression of valve mesenchymal cell proliferation and in ErbB1 ligand-mediated upregulation of proliferation in the absence of HB-EGF

To investigate the molecular mechanism governing HB-EGF-associated regulation of cell proliferation in valvulogenesis, we have previously performed *ex vivo* experiments using cardiac cushion explants (Iwamoto et al., 2010). In this culture system, a cushion explant from an E10.5 embryonic heart was placed on a type I collagen gel containing hyaluronic acid (HA-Col) (Fig. 1A). Endocardial cells derived from the endocardium of the cushion explants (ON-gel cells) proliferated and spread on the surface of HA-Col, while some endocardial cells differentiated into mesenchymal cells that invaded into HA-Col and proliferated (IN-gel cells). We had already confirmed by immunohistochemistry that ON-gel cells express CD31 (also known as PECAM-1), an endocardial marker, and IN-gel cells express  $\alpha$ -smooth muscle actin (also known as ACTA2), a mesenchymal marker (Iwamoto et al., 2010). Under this culture condition, IN-gel cells from HB-EGF-knockout (KO) (*HB<sup>del/del</sup>*) explants proliferated much more than those from wild-type (WT) explants, whereas ON-gel cells from WT and *HB<sup>del/del</sup>* cushions proliferated at comparable levels (Fig. 1B,C). Therefore, this *ex vivo* experimental system reproduces *in vivo* data and shows a functional relationship between HB-EGF and mesenchymal cell proliferation (Iwamoto et al., 2010). Upregulation of the mesenchymal cell proliferation of *HB<sup>del/del</sup>* explants suggests that HB-EGF functions as a ‘growth-inhibiting’ factor for mesenchymal cells, and that an unknown signal(s) promoting cell proliferation exists in parallel with the HB-EGF-mediated inhibitory cascade. Thus, we investigated which receptors transmit each signal in parallel by first focusing on ErbB1. ErbB1 is thought to be involved in the inhibitory signals induced by HB-EGF, because *ERBB1*-null mice develop cardiac valve enlargement, as observed in *HBEGF*-null mice (Chen et al., 2000; Jackson et al., 2003).

First, we employed ZD1839, a chemical inhibitor of ErbB1. This inhibitor specifically inhibits ErbB1 activity among ErbB RTKs (Scheipl et al., 2016). ZD1839 upregulated WT cell proliferation, as observed previously (Iwamoto et al., 2010). Moreover, surprisingly, ZD1839 downregulated hyperproliferation of *HB<sup>del/del</sup>* cells (Fig. 1B,C). These results strongly suggest that ErbB1 activity is required not only for HB-EGF-mediated suppression of WT cell proliferation but also for promotion of increased proliferation in *HB<sup>del/del</sup>* cells.

To confirm the above possibility *in vivo*, we used a hypomorphic ErbB1 mutant mouse called *waved-2* (Luetteke et al., 1994) and tested for a genetic interaction between *HBEGF* and *ERBB1*. In *waved-2* mice, the kinase activity of ErbB1 decreases to <10% of that

of WT ErbB1 because of a point mutation in the kinase domain. Although *waved-2* single-mutant embryos (+/+; *wa2/wa2*) showed a weak but significant valve-enlarged phenotype, the abnormalities in *HB<sup>del/del</sup>* and *waved-2* double-mutant embryos (*d/d*; *wa2/wa2*) were significantly weaker than those of *HB<sup>del/del</sup>* single mutants (*d/d*; +/+) (Fig. 2). These results indicate that ErbB1 is also required to promote the increased proliferation of *HB<sup>del/del</sup>* cells. Immunohistochemistry analysis for phosphorylated ErbB1 showed that the phosphorylation rate of ErbB1 was comparable between WT and *HB<sup>del/del</sup>* valves (Fig. S1). This finding suggests that, even in the absence of HB-EGF, a certain ligand (or ligands) of ErbB1 still activates ErbB1 in mesenchymal cells of developing valves. Taken together, these results indicate that ErbB1 functions in both HB-EGF-mediated inhibition of mesenchymal cell proliferation and in the promotion of hyperproliferation in HB-EGF-lacking cells.

### ErbB4 is involved in HB-EGF-mediated suppression of valve mesenchymal cell proliferation

In terms of the mechanism of ErbB1 signalling during both inhibition and promotion of cell proliferation, we hypothesised that ErbB1 may function by forming a dimer with different ErbB partners to achieve each function. To examine this possibility, we checked the expression of each ErbB receptor mRNA in explanted cells. Reverse-transcriptase (RT)-PCR analysis showed expression of ErbB1 and ErbB4 but little or no expression of ErbB2 and ErbB3 in valve cells (Fig. S2A). This result suggests that ErbB1 may function by forming a dimer with ErbB1 itself (ErbB1–ErbB1 homodimer) and/or with ErbB4 (ErbB1–ErbB4 heterodimer).

Next, we examined the effect of forced expression of a dominant-negative form of ErbB1 (dn-ErbB1) (Kashles et al., 1991) (Fig. 3A; Fig. S2B). It has been reported that this mutant form specifically inhibits cognate ErbB1 receptors (Xie et al., 1997). Similar to the effect of the inhibitor, forced expression of dn-ErbB1 not only upregulated WT mesenchymal cell proliferation but also downregulated hyperproliferation of *HB<sup>del/del</sup>* cells (Fig. 3B,C; Fig. S3A,B). These results confirmed that ErbB1 functions in both HB-EGF-mediated inhibition of mesenchymal cell proliferation and in promotion of hyperproliferation in the absence of HB-EGF. Next, we examined dn-ErbB2 (Jones and Stern, 1999), dn-ErbB3 (Ram et al., 2000) and dn-ErbB4 (Jones et al., 1999) (Fig. 3A; Fig. S2B) to determine which ErbB receptor functions with ErbB1 in each process. It has been reported that these mutant forms also specifically inhibit cognate ErbB receptors (Jones and Stern, 1999; Ram et al., 2000; Jones et al., 1999). Consistent with their low levels of endogenous expression, dn-ErbB2 and dn-ErbB3 had little effect on mesenchymal cell proliferation. Conversely, dn-ErbB4 increased cell proliferation by inhibiting HB-EGF-mediated suppression of WT mesenchymal cell proliferation, but not hyperproliferation of *HB<sup>del/del</sup>* cells (Fig. 3B,C; Fig. S3A,B). These results strongly indicate the specific involvement of ErbB4 in the HB-EGF-mediated inhibitory process. The dn-ErbB4 used here was a deletion mutant lacking the cytoplasmic domain (Fig. 3A). Thus, there is the possibility that dn-ErbB4 depletes HB-EGF in the culture system, and that the effect of the dominant-negative mutant does not represent the supposed dominant-negative effect of ErbB4. However, addition of excess amounts of recombinant HB-EGF did not alter the effects of dn-ErbB4 (Fig. S3C,D), ruling out the possibility of HB-EGF depletion by dn-ErbB4. Taken together, these results strongly suggest that activation of the heterodimer consisting of ErbB1 and ErbB4 by HB-EGF suppresses cell proliferation, whereas activation of the ErbB1 homodimer by ErbB1 ligands promotes cell proliferation.

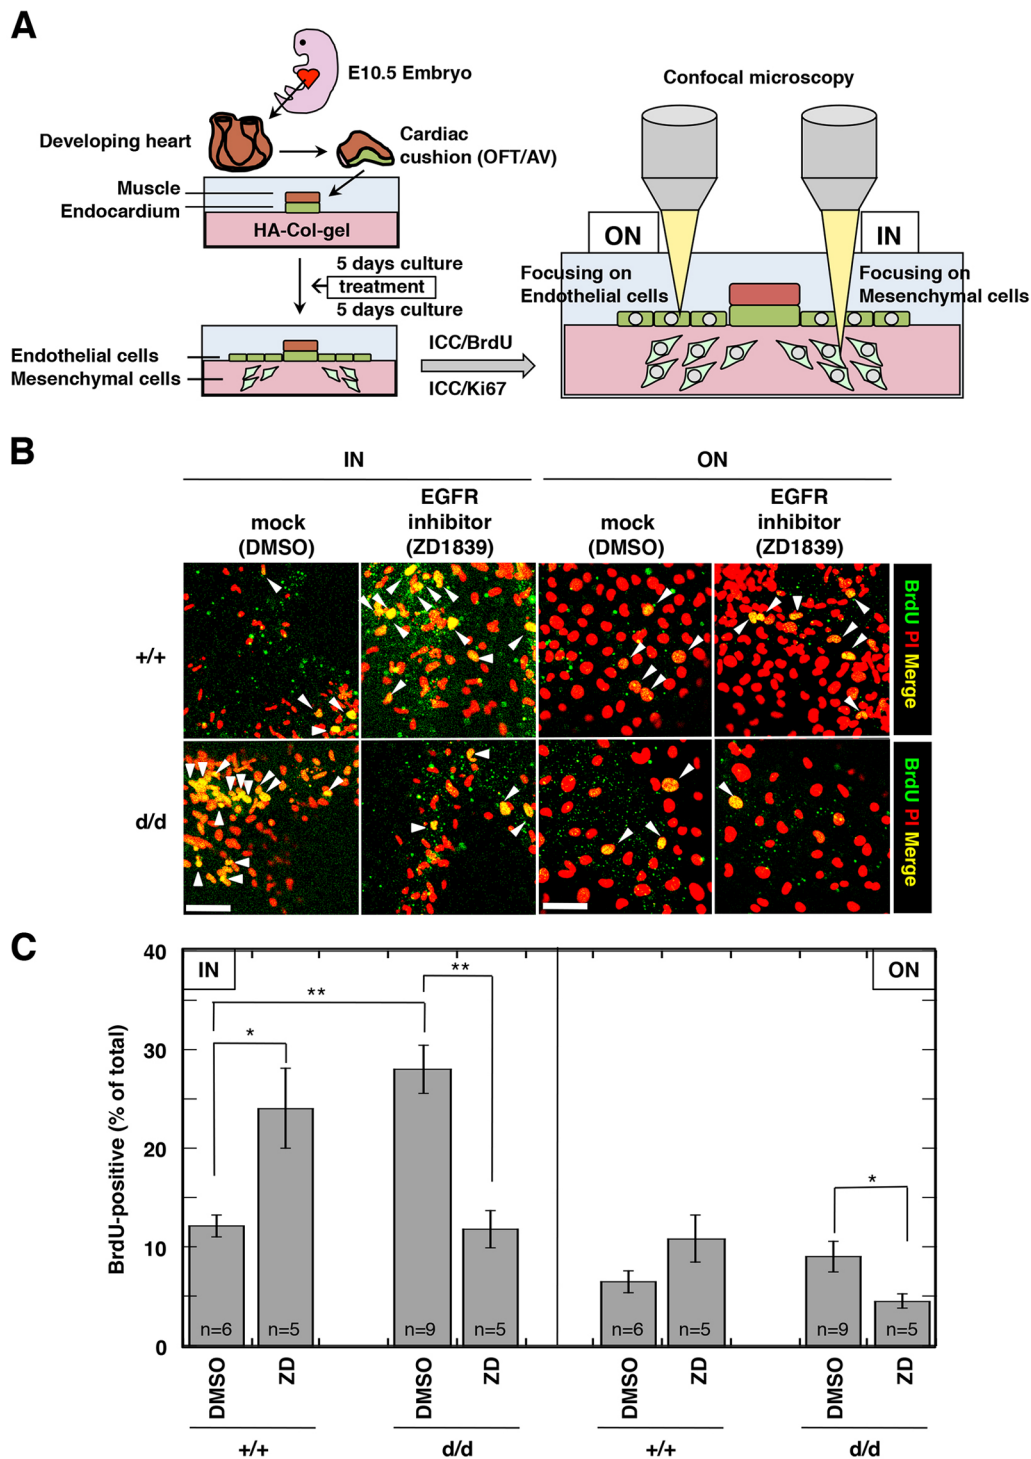

**Fig. 1. Inhibition of ErbB1 in cushion explants.** (A) Schematic illustration of the cushion explant culture system. OFT, outflow tract; AV, atrioventricular; ICC, immunocytochemistry. (B) Representative images of mesenchymal (IN) and endocardial (ON) cells of cushion explants from WT (+/+) and  $HB^{del/del}$  (d/d) embryos that were mock treated (DMSO) or treated with ZD1839 (0.3  $\mu$ M), an EGFR inhibitor. Cells were stained with propidium iodide (PI) (red, nuclei) and an anti-BrdU antibody (green), and then the images were merged. Yellow cells represent BrdU-positive cells (arrowheads). Scale bars: 50  $\mu$ m. (C) Scoring of BrdU-positive mesenchymal (IN) and endocardial (ON) cells of WT (+/+) and  $HB^{del/del}$  (d/d) cushion explants treated with ZD1839 based on the data shown in B. ZD, ZD1839. Data represent the mean values  $\pm$  s.e.m. of results obtained from at least five individual explants (sample numbers are indicated at the bottom of the corresponding bar). Statistical significance was assessed using the two-tailed Student's *t*-test. \* $P < 0.05$ ; \*\* $P < 0.01$ . See also Fig. S1.

### Upregulation of valve mesenchymal cell proliferation in $ERBB4$ -KO mice

To investigate whether ErbB4 regulates growth inhibition during valvulogenesis *in vivo*, we analysed the valve phenotype of  $ERBB4$ -

KO ( $ERBB4^{-/-}$ ) mice and examined the proliferation of mesenchymal cells in *ex vivo* cultures. Because of the early embryonic lethality of  $ERBB4^{-/-}$  mice before cushion formation (Gassmann et al., 1995), which is due to a defect in heart muscle

A

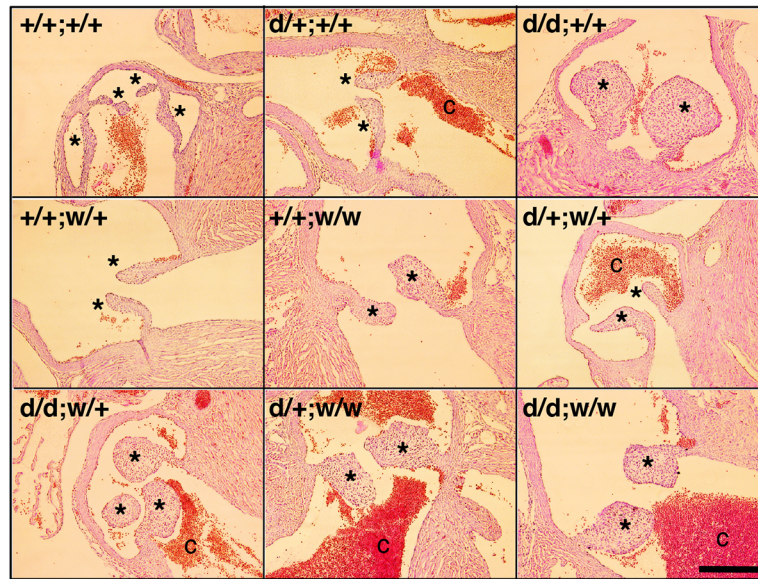

B

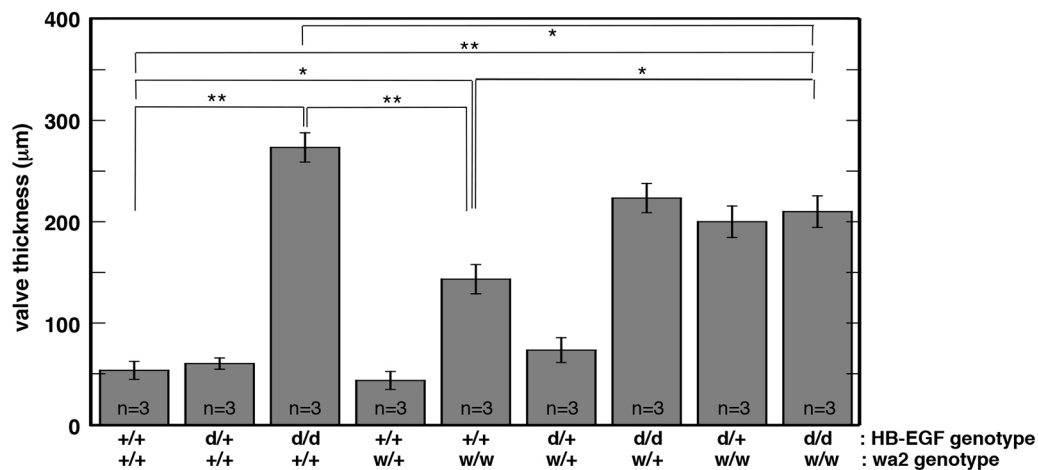

**Fig. 2. Decreased cardiac valve enlargements in a double-mutant embryo carrying *HB<sup>del</sup>* and *waved-2* EGFR alleles.** (A) Representative images of cardiac valves. Haematoxylin and eosin-stained longitudinal sections of E19.5 embryo hearts from mice of the indicated genotype (+/+, WT; d/+, *HB<sup>del/+</sup>*; d/d, *HB<sup>del/del</sup>*; w/+, *waved-2/+*; w/w, *waved-2/waved-2*) are shown. Pulmonic or aortic valves are indicated by asterisks. Blood clots are indicated as 'c'. Scale bar: 200 µm. (B) Comparison of pulmonic or aortic valve thicknesses among E19.5 embryo hearts from mice of the indicated genotype based on the representative data shown in A. The largest diameter of each valve in serial sections was measured. The valve sizes were calculated as the mean±s.e.m. of results obtained from individual embryos for all points (sample numbers are indicated at the bottom of the corresponding bar). Statistical significance was assessed using the two-tailed Student's *t*-test. \**P*<0.05; \*\**P*<0.01. See also Fig. S1.

trabeculation, we analysed a mutant mouse line rescued from early embryonic lethality through reintroduction of human ErbB4 (which is also known as HER4) in cardiomyocytes (Tidcombe et al., 2003). Because the *HER4* cDNA is under the control of the cardiac-specific  $\alpha$ -myosin heavy chain (MHC; also known as MYH6) promoter, these mice express HER4 specifically in cardiomyocytes and not in any other cell type. Thus, the heart develops normally and these mice are born, reach adulthood and are fertile (Tidcombe et al., 2003). Although the degree of abnormality was relatively milder, enlargement of the valves in 'heart-rescued' *ERBB4<sup>-/-</sup>* (*hr-ERBB4<sup>-/-</sup>*) newborns was phenotypically similar to that in *HB<sup>del/del</sup>* mice (Fig. S4A,B). The mesenchymal cells of explants from *hr-ERBB4<sup>-/-</sup>* valves showed an approximately twofold higher

proliferation rate compared with those from WT and *hr-ERBB4<sup>+/-</sup>* mice with statistical significance (Fig. 4). These results indicate that ErbB4 functions in HB-EGF-induced inhibition of mesenchymal cell proliferation in developing valves.

#### The cleavable JM-A isoform of ErbB4 functions in the suppression of valve mesenchymal cell proliferation

Unlike other ErbB family RTKs, ErbB4 has alternatively spliced variants. Among them, ErbB4 is classified as JM-A or JM-B – with or without a site cleaved by ADAM17 (a disintegrin and metalloproteinase) in the juxtamembrane domain, respectively (Carpenter, 2003; Veikkolainen et al., 2011). Upon activation by ligand binding, the ectodomain of the JM-A variant is proteolytically

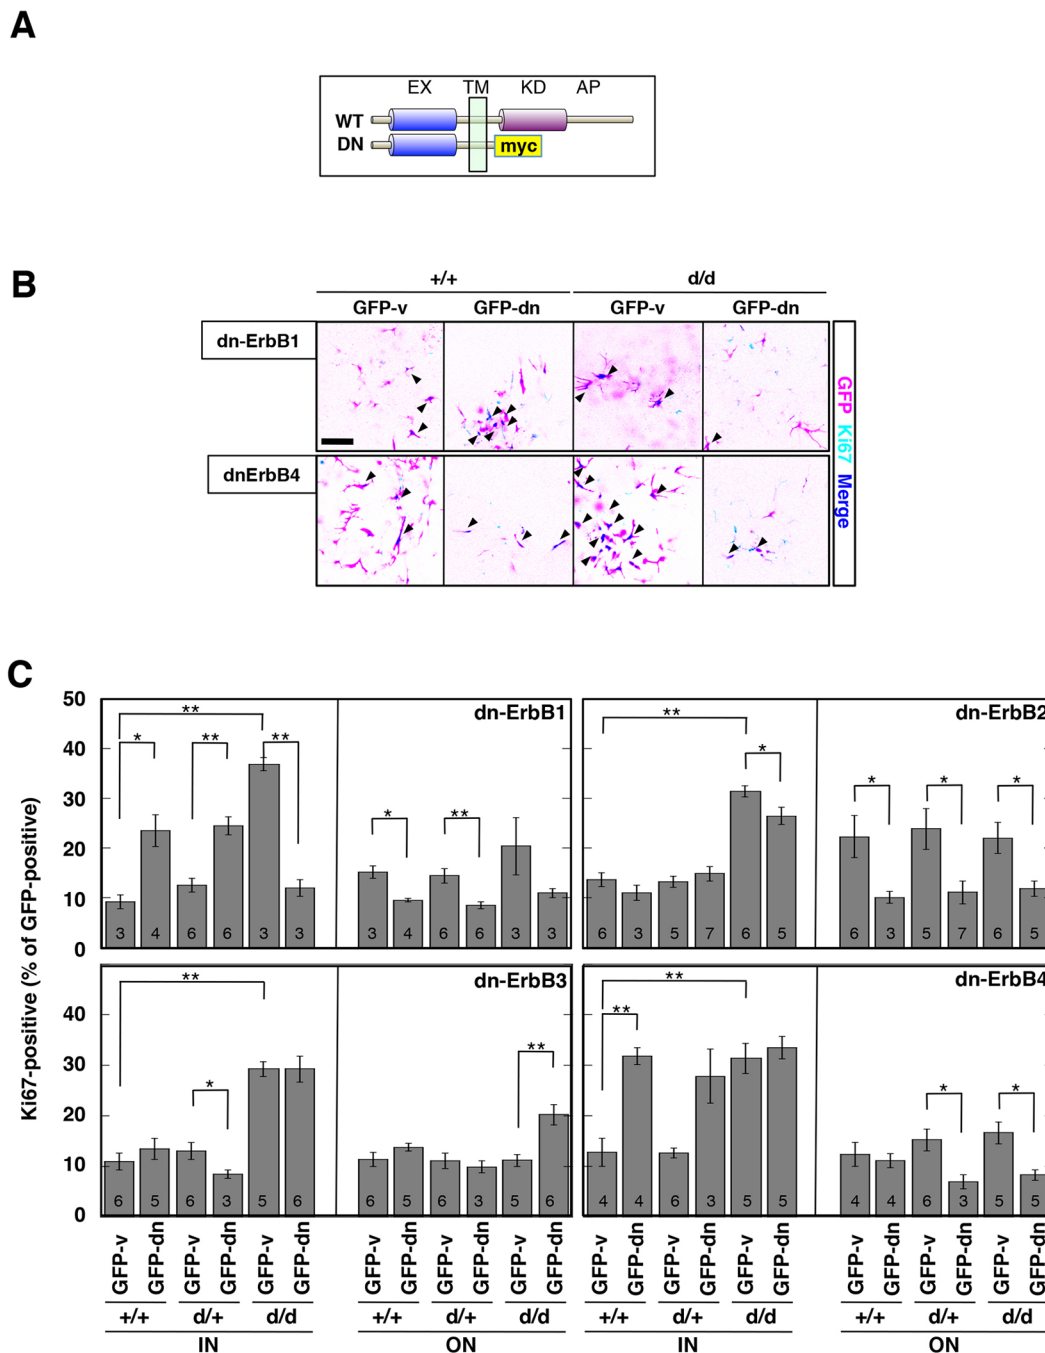

**Fig. 3. Effects of the expression of a dominant-negative mutant for each ErbB receptor on cell proliferation in cushion explants.** (A) Schematic representation of wild-type ErbB1 to 4 (WT) and dominant-negative forms of ErbB1 to 4 with a Myc tag (DN). EX, extracellular domain; TM, transmembrane domain; KD, kinase domain; AP, autophosphorylation domain; Myc, Myc tag. (B) Representative images of mesenchymal IN-gel cells of cushion explants from WT (+/+) and *HB<sup>del/del</sup>* (d/d) embryos that were mock transfected with an empty GFP vector (GFP-v) or each dominant-negative mutant IRES-linked GFP vector (GFP-dn) for ErbB1 (dn-ErbB1) and ErbB4 (dn-ErbB4). Cells were stained with an anti-Ki67 antibody, and then the images were merged with GFP images. All images were automatically colour converted (see Fig. S3A for details). Magenta cells with an indigo blue nucleus represent GFP and Ki67 double-positive cells (arrowheads). Scale bar: 100  $\mu$ m. The full panel containing representative images of both mesenchymal (IN) and endocardial (ON) cells of cushion explants that were mock transfected with an empty GFP vector or each dominant-negative ErbB1 to 4 mutant is shown in Fig. S3B. (C) Scoring of GFP and Ki67 double-positive mesenchymal (IN) and endocardial (ON) cells of WT (+/+), *HB<sup>del/+</sup>* (d/+) and *HB<sup>del/del</sup>* (d/d) cushion explants transfected with each dominant-negative mutant based on the representative data shown in C and Fig. S3B. Data represent the mean values  $\pm$  s.e.m. of results obtained from at least three individual explants (sample numbers are indicated at the bottom of the corresponding bar). Statistical significance was assessed using the two-tailed Student's *t*-test. \**P*<0.05; \*\**P*<0.01. See also Figs S2A,B and S3.

cleaved by ADAM17, generating the membrane-associated C-terminal fragment of ErbB4 (ErbB4-CTF). This cleavage is followed by intramembrane proteolysis by presenilin-1 (PS1),

resulting in translocation of the soluble intracellular domain of ErbB4 (ErbB4-ICD) into the nucleus (Lee et al., 2002; Medina and Dotti, 2003). The ICD then activates or inhibits the expression of

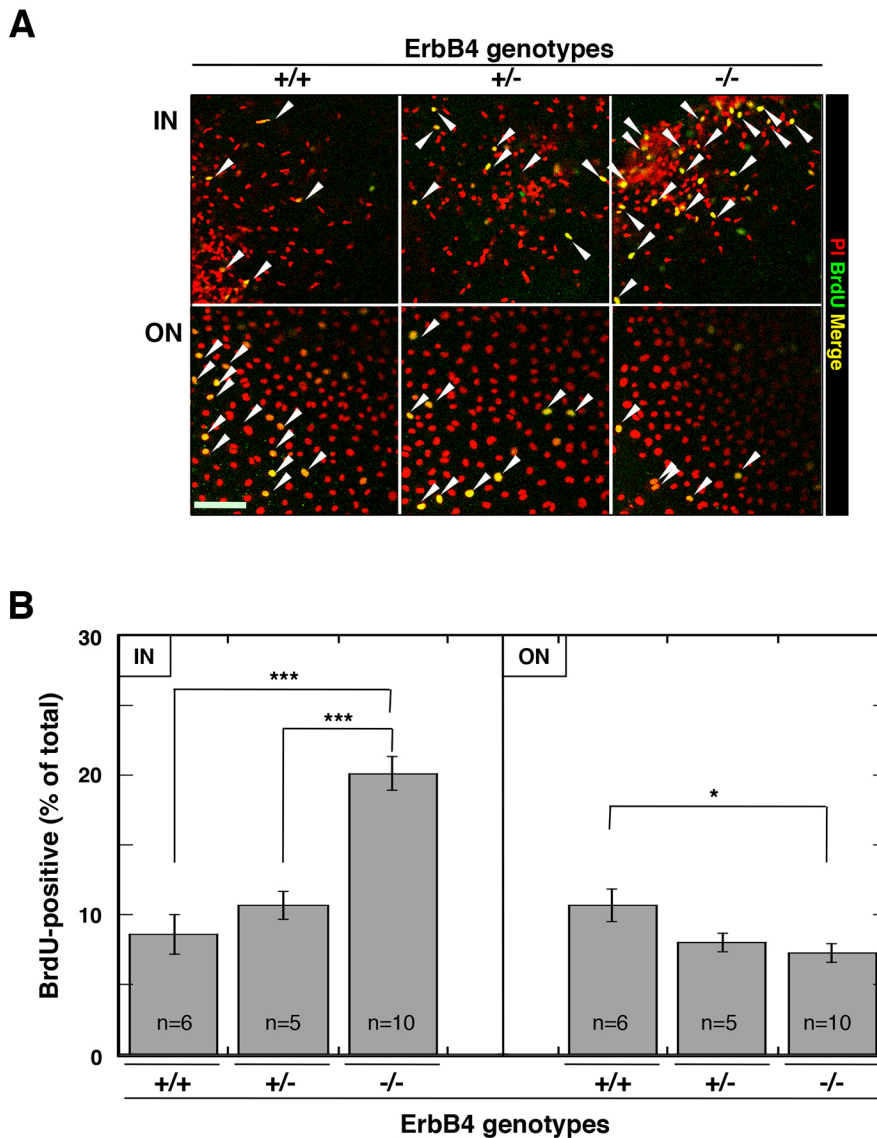

**Fig. 4. Increased proliferation of mesenchymal cells from *ERBB4*-KO cushion explants.**

(A) Representative images of mesenchymal (IN) and endocardial (ON) cells of explants from WT (+/+), *ERBB4*<sup>+/-</sup> (+/-) and *ERBB4*<sup>-/-</sup> (-/-) embryos. Cells were stained with propidium iodide (PI; red, nuclei) and an anti-BrdU antibody (green), and the images were merged. Yellow cells represent BrdU-positive cells (arrowheads). Scale bar: 100  $\mu$ m. (B) Scoring of BrdU-positive mesenchymal (IN) and endocardial (ON) cells of explants from WT (+/+), *ERBB4*<sup>+/-</sup> (+/-) and *ERBB4*<sup>-/-</sup> (-/-) embryos based on the representative data shown in A. Data represent the mean values  $\pm$  s.e.m. of results obtained from at least five individual explants (sample numbers are indicated at the bottom of the corresponding bar). Statistical significance was assessed by the two-tailed Student *t*-test. \**P*<0.05; \*\*\**P*<0.001. See also Fig. S4.

several genes (Veikkolainen et al., 2011). Conversely, the JM-B variant is uncleavable because of a difference in the amino acid sequence corresponding to the juxtamembrane domain, which is recognised by ADAM17. Thus, similar to other ErbB RTKs, the JM-A variant activates canonical signalling cascades (Veikkolainen et al., 2011).

To reveal which ErbB4 isoform (JM-A or JM-B) dimerizes with ErbB1 to inhibit cell proliferation, we examined the expression of these isoforms at the mRNA level. RT-PCR analysis using specific primer sets for the mRNA of each isoform of *ERBB4* showed expression of both JM-A and JM-B in explanted cells (Fig. S2C). Next, we performed a rescue experiment by introducing a vector encoding cleavable JM-A, uncleavable JM-B or the cleaved soluble ICD (Fig. 5A; Fig. S2D,E) into explants of *ERBB4*<sup>-/-</sup> and *ERBB4*<sup>+/-</sup> valves (Fig. 5B,C; Fig. S4C). Cleavable JM-A significantly suppressed hyperproliferation of *ERBB4*<sup>-/-</sup> mesenchymal cells. Uncleavable JM-B did not affect the hyperproliferation of *ERBB4*<sup>-/-</sup> mesenchymal cells but significantly increased the proliferation of *ERBB4*<sup>+/-</sup> cells. Expression of only the soluble ICD weakly but significantly suppressed hyperproliferation of *ERBB4*<sup>-/-</sup> mesenchymal cells (Fig. 5B,C; Fig. S4C). Similar results were obtained using explants

of *HB*<sup>del/del</sup> and WT valves (Fig. 6; Fig. S4D). Cleavable JM-A significantly suppressed hyperproliferation of *HB*<sup>del/del</sup> mesenchymal cells, indicating that the JM-A variant of ErbB4 functions downstream of HB-EGF. Uncleavable JM-B significantly increased the proliferation of WT cells but did not affect hyper-proliferation of *HB*<sup>del/del</sup> cells (Fig. 6; Fig. S4D). Taken together, these results indicate that the JM-A variant of ErbB4 functions in this process and suggest that the ICD released from the JM-A ErbB4 variant is required for the HB-EGF-mediated suppression of cell proliferation.

## DISCUSSION

In the present study, we propose a model in which dual ErbB signalling with opposing actions is involved in the regulation of mesenchymal cell proliferation. In this model: (1) activation of the heterodimer of ErbB1 and ErbB4 by HB-EGF suppresses cell proliferation, whereas (2) activation of the homodimer of ErbB1 by a certain ErbB1 ligand(s) promotes cell proliferation (Fig. 7). The EGF–ErbB system appears to perform complex regulation of a wide range of cellular behaviours *in vivo*. However, the combinations of EGF ligands and ErbB receptors, and the patterns of ErbB dimerization, that achieve different physiological outcomes have

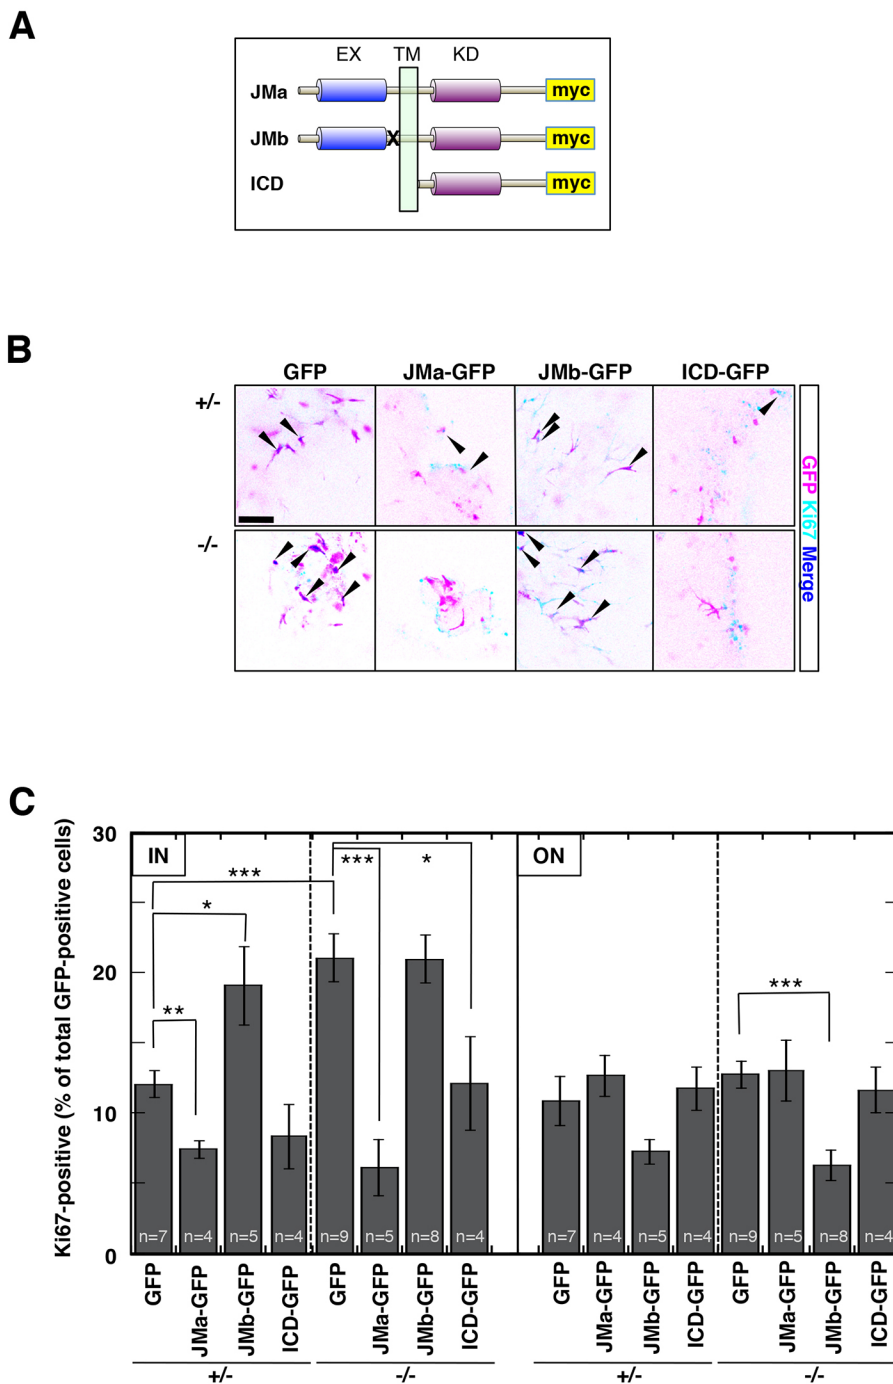

**Fig. 5. Rescue of *ERBB4*-KO cells by each ErbB4 JM isoform or the ICD from the abnormally increased proliferation in cushion explants.** (A) Schematic representation of the JM-A ErbB4 variant with a Myc tag (JMa), JM-B ErbB4 variant with a Myc tag (JMb) and only the ICD with a Myc tag (ICD). EX, extracellular domain; TM, transmembrane domain; KD, kinase domain; X, uncleavable juxtamembrane site.

(B) Representative images of mesenchymal IN-gel cells of cushion explants from *ERBB4*<sup>+/-</sup> (+/-) or *ERBB4*<sup>-/-</sup> (-/-) embryos that were mock transfected with an empty GFP vector (GFP), JM-A ErbB4 with a Myc tag IRES-linked GFP vector (JMa-GFP), JM-b ErbB4 with a Myc tag IRES-linked GFP vector (JMb-GFP) or the ICD of ErbB4 with a Myc tag IRES-linked GFP vector (ICD-GFP). Cells were stained with an anti-Ki67 antibody, and then the images were merged with those of GFP. All images were automatically colour converted. Magenta cells with an indigo blue nucleus represent GFP and Ki67 double-positive cells (arrowheads). Scale bar: 100 μm. The full panel containing representative images of both mesenchymal (IN) and endocardial (ON) cells of cushion explants is shown in Fig. S4C. (C) Scoring of GFP and Ki67 double-positive mesenchymal (IN) and endocardial (ON) cells of cushion explants from *ERBB4*<sup>+/-</sup> (+/-) and *ERBB4*<sup>-/-</sup> (-/-) embryos transfected with each construct based on the representative data shown in B and Fig. S4C. Data represent the mean values ± s.e.m. of results obtained from at least four individual explants (sample numbers are indicated at the bottom of the corresponding bar). Statistical significance was assessed using the two-tailed Student's *t*-test. \**P*<0.05; \*\**P*<0.01; \*\*\**P*<0.001. See also Figs S2C–E and S4C.

been largely unknown. Only a limited number of studies have investigated these issues. For example, previous studies have demonstrated that HB-EGF contributes to mouse heart muscle homeostasis (Iwamoto et al., 2003) and trans-retinoic-acid-induced skin hyperplasia (Kimura et al., 2005) through ErbB2–ErbB4 and ErbB1–ErbB2 heterodimers, respectively. HB-EGF and TGF $\alpha$  have been shown to synergistically contribute to skin epithelial sheet migration in mouse eyelid closure (Mine et al., 2005) and alveolar development (Minami et al., 2008) through ErbB1, although the partner of ErbB1 has not been identified. NRG1 is involved in heart trabeculation and Schwann cell development through ErbB2–ErbB4 and ErbB2–ErbB3 heterodimers, respectively (Tidcombe et al., 2003). Here, we show for the first time that two ErbB receptor

dimer combinations regulate cell proliferation in the same tissue during valvulogenesis in a competitive manner. This finding provides new insights into the role of ErbB signalling in the elaborate regulation of tissue development *in vivo*.

Our results indicate that HB-EGF binds to and activates the heterodimer of ErbB1–ErbB4 in mouse valvulogenesis, and that a certain ErbB1-ligand (or ligands) binds to and activates the homodimer of ErbB1. HB-EGF binds to both ErbB1 and ErbB4. However, why HB-EGF selectively activates the ErbB1–ErbB4 heterodimer and does not activate the ErbB1–ErbB1 homodimer in valvulogenesis is unclear. A key factor underlying this selectivity may be the interaction of HB-EGF with heparan sulfate proteoglycans (HSPGs) through the heparin-binding domain of

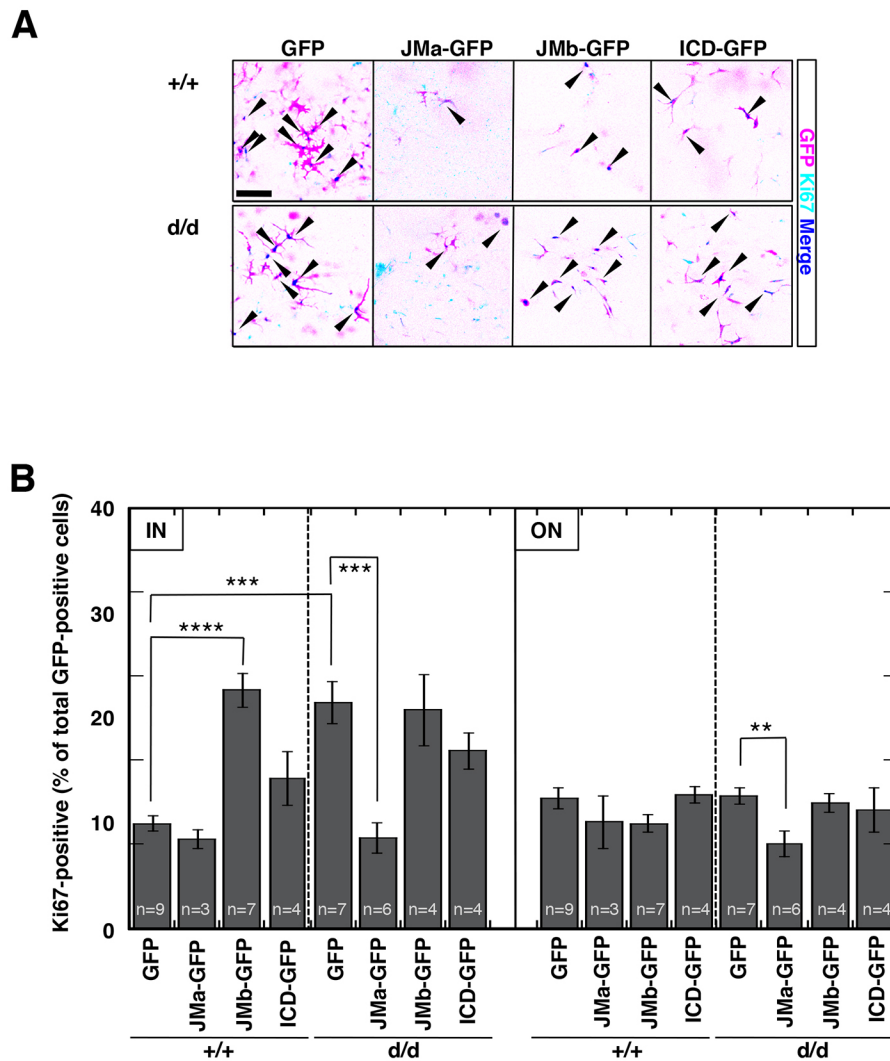

**Fig. 6. Effects of forced expression of each ErbB4 isoform or of the ICD on the abnormally increased proliferation of cells in *HB<sup>del/del</sup>* cushion explants.** (A) Representative images of mesenchymal IN-gel cells of cushion explants from WT (+/+) and *HB<sup>del/del</sup>* (*d/d*) embryos that were mock transfected with an empty GFP vector (GFP), JM-A ErbB4 with a Myc tag IRES-linked GFP vector (JM-a-GFP), JM-B ErbB4 with a Myc tag IRES-linked GFP vector (JM-b-GFP) or the ICD of ErbB4 with a Myc tag IRES-linked GFP vector (ICD-GFP). Cells were stained with an anti-Ki67 antibody, and then the images were merged with those of GFP. All images were automatically colour converted. Magenta cells with an indigo blue nucleus represent GFP and Ki67 double-positive cells (arrowheads). Scale bar: 100  $\mu$ m. The full panel containing representative images of both mesenchymal (IN) and endocardial (ON) cells of cushion explants is shown in Fig. S4D. (B) Scoring of GFP and Ki67 double-positive mesenchymal (IN) and endocardial (ON) cells of cushion explants from WT (+/+) and *HB<sup>del/del</sup>* (*d/d*) embryos transfected with each construct based on the representative data shown in A and Fig. S4D. Data represent the mean values  $\pm$  s.e.m. of results obtained from at least three individual explants (sample numbers are indicated at the bottom of the corresponding bar). Statistical significance was assessed using two-tailed Student's *t*-test. \*\**P* < 0.01; \*\*\**P* < 0.001; \*\*\*\**P* < 0.0001. See also Figs S2C–E and S4D.

HB-EGF. The interaction between HB-EGF and HSPGs is essential for normal valvulogenesis, as shown in a mutant knock-in mouse expressing a truncated form of HB-EGF that lacks the heparin-binding domain (*HB<sup>Δhb/Δhb</sup>*) (Iwamoto et al., 2010). It has also been suggested that, during blastocyst implantation, HB-EGF interacts with ErbB4 via HSPGs on the blastocyst cell surface (Paria et al., 1999). Moreover, HSPG-type CD44 is reported to recruit HB-EGF and ErbB4 during remodelling of female reproductive organs (Yu et al., 2002). Based on these findings, we presume that the interaction with HSPGs on the mesenchymal cell surface recruits HB-EGF to the ErbB1–ErbB4 heterodimer specifically, but not to the ErbB1–ErbB1 homodimer.

Our data in this study suggest that the ErbB1 homodimer contributes to mesenchymal cell proliferation in developing valves. However, the identity of the ErbB1 ligand (or ligands) that activates the ErbB1 homodimer in the mesenchymal cells, leading to the promotion of cell proliferation, is unknown. Based on our proposed requirement for an interaction between HB-EGF and HSPGs for growth inhibition by the ErbB1–ErbB4 heterodimer, among all ErbB1 ligands (HB-EGF, EGF, TGF- $\alpha$ , ARG, ERG, BTC, and EPG), the ligands with a heparin-binding activity, such as ARG and HB-EGF, may be excluded as candidates for the ErbB1-ligand(s). Moreover, expression of EGF, ARG, ERG and HB-EGF was detectable by performing RT-PCR analysis of the cultured cells

from WT explants (R.I., unpublished observation). Thus, taken together, these data suggest that EGF and ERG may be potential ligands of the ErbB1 homodimer. In addition to HB-EGF, single KO mouse lines of each ErbB1 ligand, including EGF (Luetke et al., 1999), TGF- $\alpha$  (Luetke et al., 1999), ARG (Luetke et al., 1999), ERG (Shirasawa et al., 2004), BTC (Jackson et al., 2003) and EPG (Dahlhoff et al., 2013), have already been established and reported. Furthermore, a double-KO mouse line of HB-EGF and BTC (Jackson et al., 2003) and a triple-KO mouse line of EGF, TGF- $\alpha$  and ARG (Luetke et al., 1999) have also been established and reported previously. However, any abnormalities of valve development in these KO embryos have not been demonstrated so far. These studies strongly suggest that ErbB1 ligands redundantly compensate for each other in terms of their physiological functions *in vivo*. Thus, to clarify the role of these ligands in this process, it may be necessary to generate KO mice that lack multiple ErbB1 ligands to demonstrate hypoplasia during valve development.

Several lines of evidence have implied that the bone morphogenetic protein (BMP) signalling pathway is also involved in mesenchymal cell proliferation during valvulogenesis. Increases in the activation of Smad1, Smad5 and Smad8 have been reported in the hyperproliferating cells of HB-EGF-KO valves (Jackson et al., 2003). Moreover, activation of Smad1, Smad5 and Smad8 increases in enlarged valves of TGF- $\beta$ 2-KO mice (Azhar et al., 2009) and



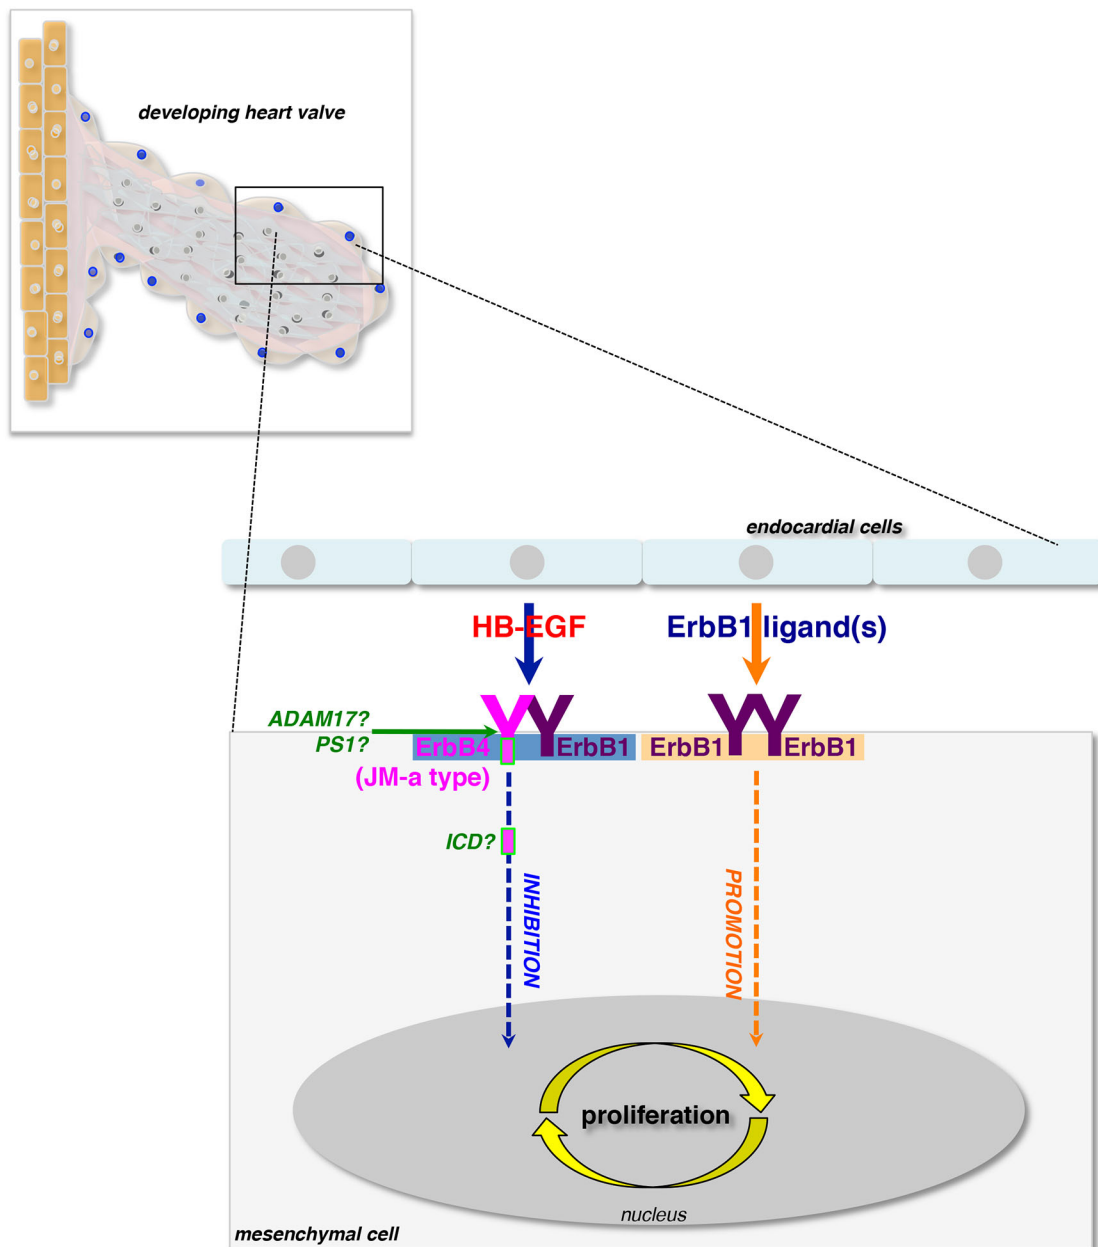

**Fig. 7. Schematic illustration of the model proposed in this study.** A dual ErbB signalling cascade competitively regulates mesenchymal cell proliferation in mouse valvulogenesis as follows: (i) HB-EGF activates the heterodimer receptor of ErbB1 and ErbB4, resulting in suppression of mesenchymal cell proliferation; (ii) activation of ErbB4 results in its sequential cleavages by ADAM17 and PS1, and ErbB4-ICD nuclear signalling may be involved in this process; (iii) an ErbB1 ligand (or ligands) activates the ErbB1 homodimer, resulting in promotion of mesenchymal cell proliferation.

CXCR7-KO mice (Sierra et al., 2007; Yu et al., 2011). To understand the entire molecular mechanism governing the regulation of cell proliferation in valvulogenesis, it will be important to study the molecular relationship between ErbB and BMP signalling pathways.

In this study, forced expression of the cleavable JM-A variant of the ErbB4 isoform or of the ICD, but not of the uncleavable JM-B variant, rescued ErbB4<sup>-/-</sup> cells from hyperproliferation. These results suggest that the cytoplasmic ICD of ErbB4, rather than the membrane-anchored tyrosine kinase, achieves this suppression. In contrast to cleavable JM-A, expression of uncleavable JM-B did not show any effects on the hyperproliferation of ErbB4<sup>-/-</sup> cells, and interestingly, upregulated WT cell proliferation. This upregulated proliferation by

JM-B might be due to the intrinsic biological activity of JM-B or inhibition of HB-EGF-mediated suppression of cell proliferation due to the dominant-negative effects of JM-B overexpression. Several lines of *in vitro* evidence indicate that the biological functions of JM-A and JM-B are different (Carpenter, 2003; Veikkolainen et al., 2011). However, the physiological functions of each isoform *in vivo* are unclear. Thus far, only one report has directly indicated a physiological function of JM-A, demonstrating a role in astrocyte differentiation during neural development (Sardi et al., 2006). Thus, our study adds valvulogenesis as a new physiological process in which JM-A physiologically functions *in vivo*. The ErbB4-ICD form, which is an artificially truncated transmembrane domain, has been thought to be constitutively active (Linggi et al., 2006; Muraoka-Cook et al.,

2009). However, the rescue activity of the ICD in *ERBB4*<sup>-/-</sup> explants was weaker than that of the full-length JM-A form. A similar result was obtained in our experiment with *HB*<sup>del/del</sup> explants. These results suggest that, for ErbB4-ICD to fully function during nuclear signalling, the ICD must be synthesised, presented on the cell surface as the full-length transmembrane JM-A variant of ErbB4 and then be sequentially cleaved on the cell surface and released into the cytoplasm.

ADAM17 (also known as tumour necrosis factor- $\alpha$  converting enzyme; TACE) is a member of the ADAM family of metalloproteinases (Scheller et al., 2011) and is suggested to be an important sheddase for HB-EGF during valvulogenesis because *ADAM17*-KO valves phenocopy *HBEGF*-KO valves (Jackson et al., 2003; Wilson et al., 2013). Similar to HB-EGF, ectodomain shedding of the JM-A variant of ErbB4 is also thought to be mediated by ADAM17 (Rio et al., 2000; Veikkolainen et al., 2011). Shedding of ErbB4 by ADAM17 is thought to be required before proceeding with intramembrane proteolysis by PS1, which releases the ErbB4 ICD into the cytoplasm (Ni et al., 2001; Veikkolainen et al., 2011). Therefore, in the inhibitory process mediated by the HB-EGF–ErbB4 axis, ADAM17 may act as a sheddase with dual functions to shed HB-EGF in endocardial cells and ErbB4 in mesenchymal cells. The molecular mechanism governing the regulation of this protease during valve remodelling processes should be investigated further in future studies.

HB-EGF plays important roles in cancer cell proliferation, malignancy, metastatic potential and chemotherapy resistance (Miyamoto et al., 2006). In particular, HB-EGF expression is increased in advanced ovarian cancer tissue compared with normal ovarian tissue (Miyamoto et al., 2004) and is associated with poor clinical outcomes (Tanaka et al., 2005). HB-EGF is not only expressed in cancer cells but also in the cancer-surrounding stroma that is involved in tumour progression (Murata et al., 2011). Thus, HB-EGF is recognised as a possible target for cancer therapy. An antibody against HB-EGF (Miyamoto et al., 2011) and CRM197 (a nontoxic mutant form of diphtheria toxin that neutralises HB-EGF activity) are undergoing clinical development as anticancer drugs (Nam et al., 2014). However, such blocking therapies also have potential side effects associated with the inhibition of the physiological functions of HB-EGF. Interestingly, such physiological processes that promote cell proliferation have not been found so far (Mekada and Iwamoto, 2008; Iwamoto and Mekada, 2012). Conversely, in valvulogenesis, HB-EGF functions as an inhibitory factor. This finding supports the concept of inhibiting the proliferation of cancer cells that express HB-EGF by converting the HB-EGF function in proliferation from promotion to suppression. This process could be achieved by introducing a key factor or system into cancer cells that can govern the inhibitory mechanism in mesenchymal cells during valvulogenesis. The present study provides us with the hope that ErbB4 or the pathway downstream of ErbB4 will be a strong candidate for such a key factor. Further study of the regulatory mechanism mediated by the HB-EGF–ErbB4 signalling axis in valvulogenesis may help to establish a novel method for molecular targeted cancer therapy.

## MATERIALS AND METHODS

### Mice

The generation of *HBEGF*-KO (*HB*<sup>del/del</sup>) mice has been described previously (Iwamoto et al., 2003). These mice were backcrossed for more than 13 generations onto a C57BL/6J background. *Waved-2* mice (Luettke et al., 1994) were purchased from the Jackson Laboratory (Bar Harbor, ME). *Waved-2* mice with a mixed background of C57BL/6J and C3H/HeSnJ

when purchased were backcrossed for more than five generations onto a C57BL/6J background. To establish double-mutant mice of *waved-2* and *HB*<sup>del</sup>, *HB*<sup>del/+</sup> mice were mated with *waved-2* heterozygous (*wa2/+*) mice. *ERBB4*-KO (Gassmann et al., 1995) mice rescued from embryonic lethality by cardiac expression of HER4 (*ERBB4*<sup>-/-</sup> *HER4*<sup>heart</sup>) (Tidcombe et al., 2003) were kindly donated by Eileen Clark (MRC National Institute for Medical Research, London, UK) and used under the kind permission of Martin Gassmann (University of Basel, Switzerland). *ERBB4*<sup>+/-</sup> *HER4*<sup>heart</sup> males were crossed with *ERBB4*<sup>+/-</sup> *HER4*<sup>heart</sup> females to generate *ERBB4*<sup>-/-</sup> (null) *HER4*<sup>heart</sup>, *ERBB4*<sup>+/-</sup> *HER4*<sup>heart</sup> and WT embryos. The discovery of a vaginal plug was considered as E0.5. To analyse valve development and *ex vivo* cultures, timed pregnant females were killed, and embryos at a suitable stage for each analysis as shown below were dissected from the uteri and placed in PBS. All mice used in this study were housed in the Animal Care Facility of Osaka University Research Institute for Microbial Diseases according to the institutional guidelines for laboratory animals. The use and treatment of animals was approved by the Institutional Biosafety Committee on Biological Experimentation and the Institutional Animal Experimentation Committee at Osaka University.

### Plasmids

Full-length cDNA encoding human ErbB1 was kindly provided by Masabumi Shibuya (The University of Tokyo, Japan). Full-length cDNA encoding human ErbB2 was kindly provided by Keiichi Maruyama (The University of Tokyo, Japan). Full-length cDNAs encoding human ErbB3 and the JM-B CYT-1 variant (referred to here as JM-B) of ErbB4 were kindly provided by Klaus Elenius (University of Turku, Finland). Myc-tagged dn-ErbB1 (Kashles et al., 1991), Myc-tagged dn-ErbB2 (Jones and Stern, 1999), Myc-tagged dn-ErbB3 (Ram et al., 2000) and Myc-tagged dn-ErbB4 (Jones et al., 1999) were generated by PCR using cDNA encoding each corresponding full-length cDNA as a template. Myc-tagged JM-A CYT-1 type ErbB4 (referred to here as JM-A) and Myc-tagged CYT-1 type ErbB4-ICD (Sundvall et al., 2007) were generated by performing site-directed mutagenesis PCR using cDNA encoding full-length JM-B CYT-1 ErbB4 as a template. All generated constructs were cloned into pLVSI-NRES ZsGreen1 (Clontech, Mountain View, CA) to produce lentiviruses for infection of cushion explant cultures as described below. Preparation and titrating of lentiviruses were performed according to the manufacturer's instructions. ZsGreen1 is an analogue of green fluorescent protein (GFP) and referred to as 'GFP' in this study.

### Endocardial cushion explant cultures

To examine the proliferation of valve mesenchymal cells *in vitro*, the original method of endocardial cushion explant culture (Camenisch et al., 2002) was modified as described previously (Iwamoto et al., 2010). In brief, a cushion explant from an E10.5 embryonic heart was placed on a type I collagen gel (Cellmatrix Type I-A, Nitta Gelatin Co., Osaka, Japan) containing 0.5 mg/ml hyaluronic acid (HA-Col; 0.5 ml/well in a 24-well plate), with one side of the endocardium in contact with the gel surface. The explant was grown in 0.5 ml Medium 199 supplemented with 1% fetal calf serum (FCS), 100 U/ml penicillin, 100  $\mu$ g/ml streptomycin and 1% Insulin-Transferrin-Selenium-X (Life Technologies) at 37°C under 5% CO<sub>2</sub>. During the culture period, endocardial cells from the endocardium of the cushion explants (ON-gel cells) proliferate and spread onto the surface of HA-Col, while differentiated mesenchymal cells from the endocardium of the explants (IN-gel cells) invade into the HA-Col and proliferate. In experiments using the EGFR inhibitor ZD1839 (AstraZeneca, London, UK) or recombinant human soluble HB-EGF protein (R&D systems, Minneapolis, MN), these reagents were added on day 5 after starting the culture, and then the cells were cultured for a further 5 days. After a total of 10 days in culture, the proliferation of ON-gel and IN-gel cells was measured by BrdU incorporation for 1 h. An image of the anti-BrdU monoclonal antibody stained explant (Abcam, Cambridge, UK; see Table S1) was captured by a confocal laser scanning microscope system (LSM5 PASCAL, Carl Zeiss, Oberkochen, Germany) and analysed with Adobe Photoshop software.

In experiments using lentivirus expression vectors encoding the cDNAs described above, lentivirus infection was performed on day 5 after starting the culture, and then the cells were cultured for a further 5 days. To infect

both IN-gel and ON-gel cells, 10–20  $\mu$ l of concentrated virus solution [ $>1 \times 10^9$  transducing units (TU)/ml] in Medium 199 was directly infused into the gel beneath the explant via an ultrathin capillary. After a total 10 days in culture, the proliferation of ON-gel and IN-gel cells was measured by immunocytochemistry with a polyclonal antibody against Ki67 (Table S1) (Leica Microsystems, Tokyo, Japan) as a mitotic marker. An image of the Ki67-stained explant was captured by the confocal laser scanning microscope system and analysed with Adobe Photoshop software. In these cDNA introduction experiments, the total colour of the captured image was automatically converted to clearly distinguish signals of GFP and Ki67 (Fig. S3A). All data were analysed in a blinded manner.

### Histological analysis

Haematoxylin and eosin staining, and measurement of valve size were performed as described previously (Iwamoto et al., 2003). At E18.5 to postnatal day 0, the hearts of embryos or pups were fixed with 4% paraformaldehyde and embedded in optimal cutting temperature compound. For immunohistochemistry to detect phosphorylated ErbB1, serial frozen sections (8  $\mu$ m thick) were incubated with a rabbit monoclonal antibody against ErbB1 phosphorylated at residue Y1068 (Table S1) (Cell Signaling, Boston, MA) using the Duolink II system (Sigma-Aldrich) according to the manufacturer's instructions. For immunohistochemistry to detect total ErbB1, sections were incubated with a biotinylated anti-ErbB1 rabbit polyclonal antibody (Table S1) (Cell Signaling) and then Alexa-Fluor-488-conjugated streptavidin (Molecular Probes).

### RT-PCR analysis of ErbB receptors

Total RNA from cushion explant cells (mixture of IN-gel and ON-gel cells after removal of explants) that had been cultured for 10 days was isolated using an RNeasy Micro kit (Qiagen, Hilden, Germany). Total RNA was reverse transcribed using reverse transcriptase ReverTra Ace (TOYOBO, Tokyo, Japan).

PCR analysis was performed using ExTaq (TOYOBO) for each gene as follows: mouse *ERBB1* (94°C for 30 s, 57°C for 30 s, and 72°C for 60 s; 40 cycles); mouse *ERBB2* (94°C for 30 s, 67°C for 30 s, and 72°C for 60 s; 40 cycles); mouse *ERBB3* (94°C for 30 s, 67°C for 30 s, and 72°C for 60 s; 40 cycles); mouse *ERBB4<sub>JM-a&b</sub>* type (94°C for 30 s, 63°C for 30 s, and 72°C for 60 s; 40 cycles); mouse *ERBB4<sub>JM-a</sub>* type-specific (94°C for 30 s, 63°C for 30 s, and 72°C for 60 s; 40 cycles); and mouse *ERBB4<sub>JM-b</sub>* type-specific (94°C for 30 s, 60°C for 30 s, and 72°C for 60 s; 40 cycles).

The gene-specific primers were as follows: mouse *ERBB1* (5'-TGGAG-GAAAAGAAAGTCTGCCAAGGCAC-3' and 5'-ACATCCATCTGATAGGTTGGTGGGGTT-3'); mouse *ERBB2* (5'-GGGGGAGCTGGTTCGATGCTG-3' and 5'-CTTTGGTTACCCCACTGCC-3'); mouse *ERBB3* (5'-GGTCCGAACAGTTCTCCC-3' and 5'-GAGCGGGGTGACGGGAGTAA-3'); mouse *ERBB4<sub>JM-a&b</sub>* type (5'-GAAATGTCCAGATGGCC-TACAGGG-3' and 5'-CTTTTGTGCTCTTTCTTCTGAC-3'); mouse *ERBB4<sub>JM-a</sub>* type-specific (5'-AACGGTCCCACTAGTCATGACTGC-3' and 5'-TGGATAGTGGGACTCAGACACACT-3'); and mouse *ERBB4<sub>JM-b</sub>* type-specific (5'-ATAGGTTCAAGCATTGAAGACTGC-3' and 5'-TGGATAGTGGGACTCAGACACACT-3').

### Immunoblotting

Human HEK293 cells were transiently transfected with vectors encoding JM-A, JM-B, or the ICD by using Lipofectamine 2000 (Invitrogen Thermo Fisher Scientific, Waltham, MA, USA) according to the manufacturer's instructions, and cultured for 36 h in DMEM containing 10% heat-inactivated FCS. Then, the cells were washed, and the medium was replaced with fresh medium with or without 10% FCS. After overnight culture, the cells were treated in the presence or absence of 100 nM 12-O-tetradecanoylphorbol-13-acetate for 30 min, lysed with cell lysis buffer [60 mM 1-O-n-octyl- $\beta$ -D-glucopyranoside, 0.15 M NaCl, 10 mM HEPES-NaOH, pH 7.2, 0.01 $\times$  protease inhibitor cocktail (Nacalai, Kyoto, Japan)] and centrifuged at 20,000 g for 30 min. The supernatant was collected, mixed with sodium dodecyl sulfate (SDS) gel sample buffer with or without 10%  $\beta$ -mercaptoethanol, and loaded onto 7.5% SDS electrophoresis gels. Separated proteins were electrotransferred onto a polyvinylidene difluoride membrane (Immobilon-P; Millipore, Bedford, MA). The membrane was blocked in TTBS (10 mM

Tris-HCl, pH 7.5, 0.15 M NaCl, and 0.05% Tween 20) containing 1% dry skimmed milk for 1 h, followed by incubation with a mouse anti-Myc (9E10) monoclonal antibody (Table S1) (Santa Cruz Biotechnology) at 1  $\mu$ g/ml in TTBS for 1 h. The membrane was then incubated with a horseradish peroxidase-conjugated secondary antibody (Table S1) for 1 h. Chemiluminescent detection was performed with the ECL detection system (GE Healthcare, Buckinghamshire, UK) according to the manufacturer's instructions.

### Immunostaining

Human HT1080 cells were transiently transfected with lentiviruses containing each construct and then cultured for 72 h in DMEM containing 10% heat-inactivated FCS. Then, the cells were washed and the medium was replaced with fresh medium without FCS. After overnight culture, the cells were fixed with 4% paraformaldehyde in PBS at room temperature for 15 min, permeabilized with 0.5% Triton X-100 in PBS at room temperature for 15 min, blocked with blocking solution (2% donkey serum, 1% bovine serum albumin, and 0.05% Tween 20 in PBS) and incubated with a mouse anti-Myc (9E10) monoclonal antibody (Table S1) (Santa Cruz Biotechnology) at 2  $\mu$ g/ml in blocking solution at 4°C overnight. The cells were then incubated with Alexa-Fluor-546-conjugated donkey anti-mouse IgG (Table S1) (1:500; Molecular Probes).

### Data analysis

All quantitative data are presented as the mean  $\pm$  s.e.m. Statistical significance was assessed using the two-tailed Student *t*-test to evaluate differences between two groups. A value of  $P < 0.05$  was considered statistically significant.

### Acknowledgements

We thank M. Hamaoka, K. Nishiwaki, Y. Numata and T. Yoneda for technical assistance.

### Competing interests

The authors declare no competing or financial interests.

### Author contributions

R.I. designed the study, performed most experiments, analysed all data and wrote the manuscript. N.M. performed the histology of *HB<sup>del</sup>* and *waved-2* double-mutant valves, and analysed data of the size measurements. H.M. constructed plasmids encoding several ErbB4 variants. E.M. supervised the study and wrote the manuscript. All authors discussed the results and commented on the manuscript.

### Funding

This work was supported by Japan Society for the Promotion of Science KAKENHI [JP20570183, JP24570212 and JP15K07046 to R. I., JP26250033 to E.M.].

### Supplementary information

Supplementary information available online at <http://jcs.biologists.org/lookup/doi/10.1242/jcs.196618.supplemental>

### References

- Armstrong, E. J. and Bischoff, J. (2004). Heart valve development: endothelial cell signaling and differentiation. *Circ. Res.* **95**, 459–470.
- Azhar, M., Runyan, R. B., Gard, C., Sanford, L. P., Miller, M. L., Andringa, A., Pawlowski, S., Rajan, S. and Doetschman, T. (2009). Ligand-specific function of transforming growth factor beta in epithelial-mesenchymal transition in heart development. *Dev. Dyn.* **238**, 431–442.
- Camenisch, T. D., Schroeder, J. A., Bradley, J., Klewer, S. E. and McDonald, J. A. (2002). Heart-valve mesenchyme formation is dependent on hyaluronan-augmented activation of ErbB2-ErbB3 receptors. *Nat. Med.* **8**, 850–855.
- Carpenter, G. (2003). ErbB-4: mechanism of action and biology. *Exp. Cell Res.* **284**, 66–77.
- Chen, B., Bronson, R. T., Klamann, L. D., Hampton, T. G., Wang, J.-F., Green, P. J., Magnuson, T., Douglas, P. S., Morgan, J. P. and Neel, B. G. (2000). Mice mutant for Egrf and Shp2 have defective cardiac semilunar valvulogenesis. *Nat. Genet.* **24**, 296–299.
- Dahlhoff, M., Schäfer, M., Wolf, E. and Schneider, M. R. (2013). Genetic deletion of the EGFR ligand epigen does not affect mouse embryonic development and tissue homeostasis. *Exp. Cell Res.* **319**, 529–535.
- Elenius, K., Paul, S., Allison, G., Sun, J. and Klagsbrun, M. (1997). Activation of HER4 by heparin-binding EGF-like growth factor stimulates chemotaxis but not proliferation. *EMBO J.* **16**, 1268–1278.

- Gassmann, M., Casagrande, F., Orioli, D., Simon, H., Lai, C., Klein, R. and Lemke, G. (1995). Aberrant neural and cardiac development in mice lacking the ErbB4 neuregulin receptor. *Nature* **378**, 390-394.
- Harris, R. C., Chung, E. and Coffey, R. J. (2003). EGF receptor ligands. *Exp. Cell Res.* **284**, 2-13.
- Higashiyama, S., Abraham, J. A., Miller, J., Fiddes, J. C. and Klagsbrun, M. (1991). A heparin-binding growth factor secreted by macrophage-like cells that is related to EGF. *Science* **251**, 936-939.
- Iwamoto, R. and Mekada, E. (2006). ErbB and HB-EGF signaling in heart development and function. *Cell Struct. Funct.* **31**, 1-14.
- Iwamoto, R. and Mekada, E. (2012). HB-EGF (Heparin-Binding EGF-Like Growth Factor). In *Encyclopedia of Signaling Molecules* (ed. Sangdun Choi) pp. 849-858. Springer.
- Iwamoto, R., Yamazaki, S., Asakura, M., Takashima, S., Hasuwa, H., Miyado, K., Adachi, S., Kitakaze, M., Hashimoto, K., Raab, G. et al. (2003). Heparin-binding EGF-like growth factor and ErbB signaling is essential for heart function. *Proc. Natl. Acad. Sci. USA* **100**, 3221-3226.
- Iwamoto, R., Mine, N., Kawaguchi, T., Minami, S., Saeki, K. and Mekada, E. (2010). HB-EGF function in cardiac valve development requires interaction with heparan sulfate proteoglycans. *Development* **137**, 2205-2214.
- Jackson, L. F., Qiu, T. H., Sunnarborg, S. W., Chang, A., Zhang, C., Patterson, C. and Lee, D. C. (2003). Defective valvulogenesis in HB-EGF and TACE-null mice is associated with aberrant BMP signaling. *EMBO J.* **22**, 2704-2716.
- Jones, F. E. and Stern, D. F. (1999). Expression of dominant-negative ErbB2 in the mammary gland of transgenic mice reveals a role in lobuloalveolar development and lactation. *Oncogene* **18**, 3481-3490.
- Jones, F. E., Welte, T., Fu, X.-Y. and Stern, D. F. (1999). ErbB4 signaling in the mammary gland is required for lobuloalveolar development and Stat5 activation during lactation. *J. Cell Biol.* **147**, 77-88.
- Kashles, O., Yarden, Y., Fischer, R., Ullrich, A. and Schlessinger, J. (1991). A dominant negative mutation suppresses the function of normal epidermal growth factor receptors by heterodimerization. *Mol. Cell. Biol.* **11**, 1454-1463.
- Kimura, R., Iwamoto, R. and Mekada, E. (2005). Soluble form of heparin-binding EGF-like growth factor contributes to retinoic acid-induced epidermal hyperplasia. *Cell Struct. Funct.* **30**, 35-42.
- Lakkis, M. M. and Epstein, J. A. (1998). Neurofibromin modulation of ras activity is required for normal endocardial-mesenchymal transformation in the developing heart. *Development* **125**, 4359-4367.
- Lee, H.-J., Jung, K.-M., Huang, Y. Z., Bennett, L. B., Lee, J. S., Mei, L. and Kim, T.-W. (2002). Presenilin-dependent  $\gamma$ -secretase-like intramembrane cleavage of ErbB4. *J. Biol. Chem.* **277**, 6318-6323.
- Linggi, B., Cheng, Q. C., Rao, A. R. and Carpenter, G. (2006). The ErbB-4 s80 intracellular domain is a constitutively active tyrosine kinase. *Oncogene* **25**, 160-163.
- Luetke, N. C., Phillips, H. K., Qiu, T. H., Copeland, N. G., Earp, H. S., Jenkins, N. A. and Lee, D. C. (1994). The mouse waved-2 phenotype results from a point mutation in the EGF receptor tyrosine kinase. *Genes Dev.* **8**, 399-413.
- Luetke, N. C., Qiu, T. H., Fenton, S. E., Troyer, K. L., Riedel, R. F., Chang, A. and Lee, D. C. (1999). Targeted inactivation of the EGF and amphiregulin genes reveals distinct roles for EGF receptor ligands in mouse mammary gland development. *Development* **126**, 2739-2750.
- Medina, M. and Dotti, C. G. (2003). RIPped out by presenilin-dependent gamma-secretase. *Cell Signal.* **15**, 829-841.
- Mekada, E. and Iwamoto, R. (2008). HB-EGF. *UCSD-Nature Molecule Pages*.
- Minami, S., Iwamoto, R. and Mekada, E. (2008). HB-EGF decelerates cell proliferation synergistically with TGF $\alpha$  in perinatal distal lung development. *Dev. Dyn.* **237**, 247-258.
- Mine, N., Iwamoto, R. and Mekada, E. (2005). HB-EGF promotes epithelial cell migration in eyelid development. *Development* **132**, 4317-4326.
- Miyamoto, S., Hirata, M., Yamazaki, A., Kageyama, T., Hasuwa, H., Mizushima, H., Tanaka, Y., Yagi, H., Sonoda, K., Kai, M. et al. (2004). Heparin-binding EGF-like growth factor is a promising target for ovarian cancer therapy. *Cancer Res.* **64**, 5720-5727.
- Miyamoto, S., Yagi, H., Yotsumoto, F., Kawarabayashi, T. and Mekada, E. (2006). Heparin-binding epidermal growth factor-like growth factor as a novel targeting molecule for cancer therapy. *Cancer Sci.* **97**, 341-347.
- Miyamoto, S., Iwamoto, R., Furuya, A., Takahashi, K., Sasaki, Y., Ando, H., Yotsumoto, F., Yoneda, T., Hamaoka, M., Yagi, H. et al. (2011). A novel anti-human HB-EGF monoclonal antibody with multiple anti-tumor mechanisms against ovarian cancer cells. *Clin. Cancer Res.* **17**, 6733-6741.
- Muraoka-Cook, R. S., Sandahl, M. A., Strunk, K. E., Miraglia, L. C., Husted, C., Hunter, D. M., Elenius, K., Chodosh, L. A. and Earp, H. S. III. (2009). ErbB4 splice variants Cyt1 and Cyt2 differ by 16 amino acids and exert opposing effects on the mammary epithelium in vivo. *Mol. Cell. Biol.* **29**, 4935-4948.
- Murata, T., Mizushima, H., Chinen, I., Moribe, H., Yagi, S., Hoffman, R. M., Kimura, T., Yoshino, K., Ueda, Y., Enomoto, T. et al. (2011). HB-EGF and PDGF mediate reciprocal interactions of carcinoma cells with cancer-associated fibroblasts to support progression of uterine cervical cancers. *Cancer Res.* **71**, 6633-6642.
- Nam, S. O., Yotsumoto, F., Miyata, K., Suzuki, Y., Yagi, H., Odawara, T., Manabe, S., Ishikawa, T., Kuroki, M., Mekada, E. et al. (2014). Pre-clinical study of BK-UM, a novel inhibitor of HB-EGF, for ovarian cancer therapy. *Anticancer Res.* **34**, 4615-4620.
- Ni, C.-Y., Murphy, M. P., Golde, T. E. and Carpenter, G. (2001). Gamma-secretase cleavage and nuclear localization of ErbB-4 receptor tyrosine kinase. *Science* **294**, 2179-2181.
- Olayioye, M. A., Neve, R. M., Lane, H. A. and Hynes, N. E. (2000). The ErbB signaling network: receptor heterodimerization in development and cancer. *EMBO J.* **19**, 3159-3167.
- Paria, B. C., Elenius, K., Klagsbrun, M. and Dey, S. K. (1999). Heparin-binding EGF-like growth factor interacts with mouse blastocysts independently of ErbB1: a possible role for heparan sulfate proteoglycans and ErbB4 in blastocyst implantation. *Development* **126**, 1997-2005.
- Raab, G. and Klagsbrun, M. (1997). Heparin-binding EGF-like growth factor. *Biochim. Biophys. Acta* **1333**, F179-F199.
- Ram, T. G., Schelling, M. E. and Hosick, H. L. (2000). Blocking HER2/HER-3 function with a dominant negative form of HER-3 in cells stimulated by heregulin and in breast cancer cells with HER-2 gene amplification. *Cell Growth Differ.* **11**, 173-183.
- Riese, D. J., II and Stern, D. F. (1998). Specificity within the EGF family/ErbB receptor family signaling network. *BioEssays* **20**, 41-48.
- Rio, C., Buxbaum, J. D., Peschon, J. J. and Corfas, G. (2000). Tumor necrosis factor- $\alpha$ -converting enzyme is required for cleavage of erbB4/HER4. *J. Biol. Chem.* **275**, 10379-10387.
- Sardi, S. P., Murtie, J., Koirala, S., Patten, B. A. and Corfas, G. (2006). Presenilin-dependent ErbB4 nuclear signaling regulates the timing of astrogenesis in the developing brain. *Cell* **127**, 185-197.
- Scheipl, S., Barnard, M., Cottone, L., Jorgensen, M., Drewry, D. H., Zuercher, W. J., Turlais, F., Ye, H., Leite, A. P., Smith, J. A. et al. (2016). EGFR inhibitors identified as a potential treatment for chordoma in a focused compound screen. *J. Pathol.* **239**, 320-334.
- Scheller, J., Chalaris, A., Garbers, C. and Rose-John, S. (2011). ADAM17: a molecular switch to control inflammation and tissue regeneration. *Trends Immunol.* **32**, 380-387.
- Schroeder, J. A., Jackson, L. F., Lee, D. C. and Camenisch, T. D. (2003). Form and function of developing heart valves: coordination by extracellular matrix and growth factor signaling. *J. Mol. Med.* **81**, 392-403.
- Shirasawa, S., Sugiyama, S., Baba, I., Inokuchi, J., Sekine, S., Ogino, K., Kawamura, Y., Dohi, T., Fujimoto, M. and Sasazuki, T. (2004). Dermatitis due to epiregulin deficiency and a critical role of epiregulin in immune-related responses of keratinocyte and macrophage. *Proc. Natl. Acad. Sci. USA* **101**, 13921-13926.
- Sierro, F., Biben, C., Martinez-Munoz, L., Mellado, M., Ransohoff, R. M., Li, M., Woehli, B., Leung, H., Groom, J., Batten, M. et al. (2007). Disrupted cardiac development but normal hematopoiesis in mice deficient in the second CXCL12/SDF-1 receptor, CXCR7. *Proc. Natl. Acad. Sci. USA* **104**, 14759-14764.
- Sundvall, M., Peri, L., Määttä, J. A., Tvorogov, D., Paatero, I., Savisalo, M., Silvennoinen, O., Yarden, Y. and Elenius, K. (2007). Differential nuclear localization and kinase activity of alternative ErbB4 intracellular domains. *Oncogene* **26**, 6905-6914.
- Tanaka, Y., Miyamoto, S., Suzuki, S. O., Oki, E., Yagi, H., Sonoda, K., Yamazaki, A., Mizushima, H., Maehara, Y., Mekada, E. et al. (2005). Clinical significance of heparin-binding epidermal growth factor-like growth factor and a disintegrin and metalloprotease 17 expression in human ovarian cancer. *Clin. Cancer Res.* **11**, 4783-4792.
- Tidcombe, H., Jackson-Fisher, A., Mathers, K., Stern, D. F., Gassmann, M. and Golding, J. P. (2003). Neural and mammary gland defects in ErbB4 knockout mice genetically rescued from embryonic lethality. *Proc. Natl. Acad. Sci. USA* **100**, 8281-8286.
- Veikkolainen, V., Vaparanta, K., Halkilahti, K., Iljin, K., Sundvall, M. and Elenius, K. (2011). Function of ERBB4 is determined by alternative splicing. *Cell Cycle* **10**, 2647-2657.
- Wilson, C. L., Gough, P. J., Chang, C. A., Chan, C. K., Frey, J. M., Liu, Y., Braun, K. R., Chin, M. T., Wight, T. N. and Raines, E. W. (2013). Endothelial deletion of ADAM17 in mice results in defective remodeling of the semilunar valves and cardiac dysfunction in adults. *Mech. Dev.* **130**, 272-289.
- Xie, W., Paterson, A. J., Chin, E., Nabell, L. M. and Kudlow, J. E. (1997). Targeted expression of a dominant negative epidermal growth factor receptor in the mammary gland of transgenic mice inhibits pubertal mammary duct development. *Mol. Endocrinol.* **11**, 1766-1781.
- Yamazaki, S., Iwamoto, R., Saeki, K., Asakura, M., Takashima, S., Yamazaki, A., Kimura, R., Mizushima, H., Moribe, H., Higashiyama, S. et al. (2003). Mice with defects in HB-EGF ectodomain shedding show severe developmental abnormalities. *J. Cell Biol.* **163**, 469-475.
- Yu, W.-H., Woessner, J. F., Jr, McNeish, J. D. and Stamenkovic, I. (2002). CD44 anchors the assembly of matrilysin/MMMP-7 with heparin-binding epidermal growth factor precursor and ErbB4 and regulates female reproductive organ remodeling. *Genes Dev.* **16**, 307-323.
- Yu, S., Crawford, D., Tsuchihashi, T., Behrens, T. W. and Srivastava, D. (2011). The chemokine receptor CXCR7 functions to regulate cardiac valve remodeling. *Dev. Dyn.* **240**, 384-393.
